# Supplementary material for: Optical and electronic properties of transparent conducting Ta:TiO2 thin and ultra-thin films: the effect of doping and thickness
Source: Royal Society of Chemistry journal article supplement (doi:10.1039/d1ma00584g), 2021-01-01
Supplement: d1ma00584g1.pdf [file d1ma00584g1.pdf]

Optical and electronic properties of transparent conducting Ta:TiO<sub>2</sub> thin and ultra-thin films: effect of doping and thickness

Beatrice R. Bricchi\*, Maria Sygletou, Luca Ornago, Giancarlo Terraneo, Francesco Bisio, Cristina Mancarella, Lorenzo Stasi, Francesco Rusconi, Erika Magni, Matteo Ghidelli, Paolo Biagioni, Andrea Li Bassi

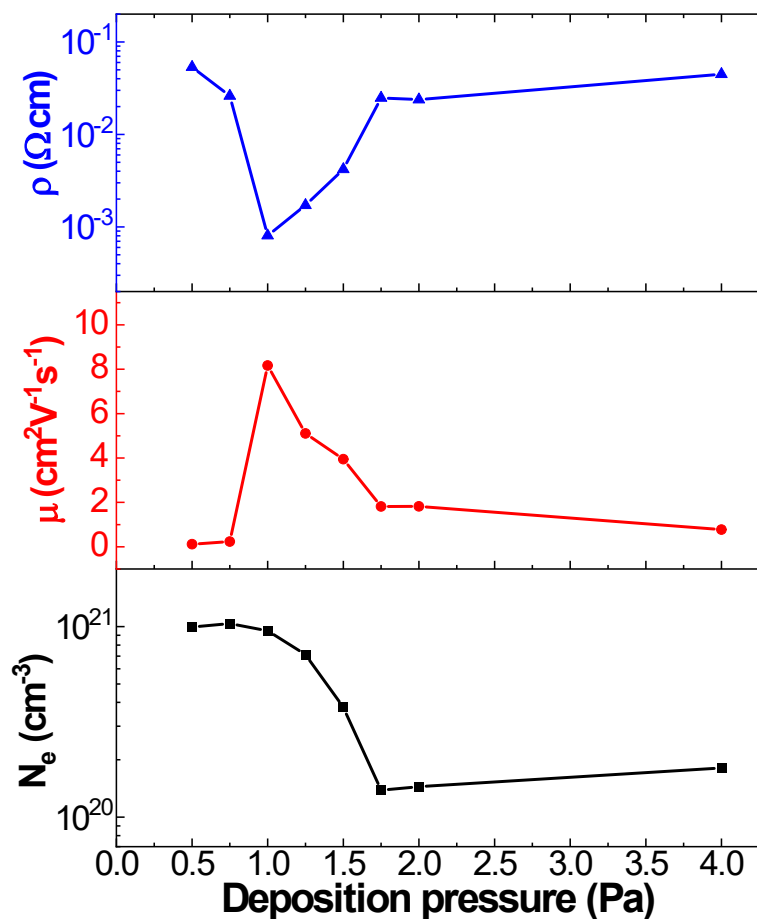

Figure S1 - Resistivity ( $\rho$ ), charge carrier density ( $N_e$ ) and mobility ( $\mu$ ) as a function of background oxygen pressure ( $P$ ) during deposition of Ta(5%):TiO<sub>2</sub> films thick 200 nm.

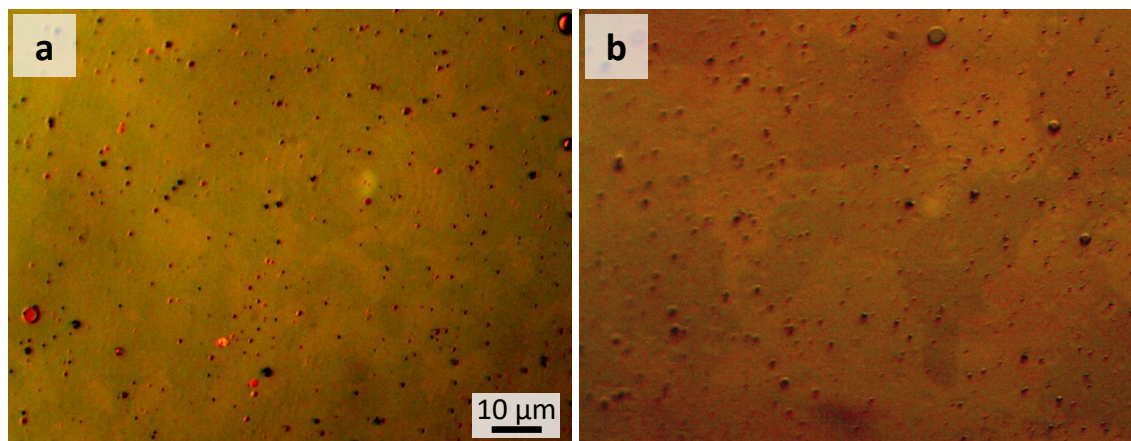

Figure S2 - Optical microscope images of surfaces of 200 nm-thick vacuum-annealed (a) Ta(5%):TiO<sub>2</sub> and (b) Ta(10%):TiO<sub>2</sub>. All samples were deposited on glass substrate.

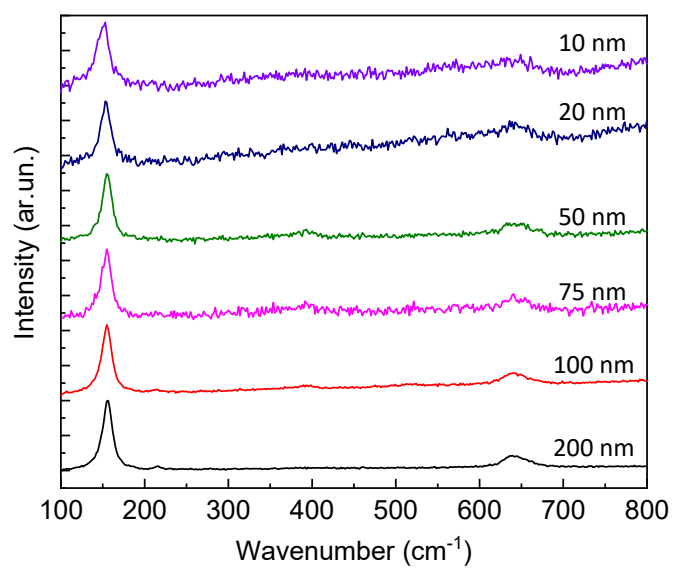

Figure S3 - Raman spectra of Ta(10%):TiO<sub>2</sub> films at different thickness, i.e. from 10 up to 200 nm.

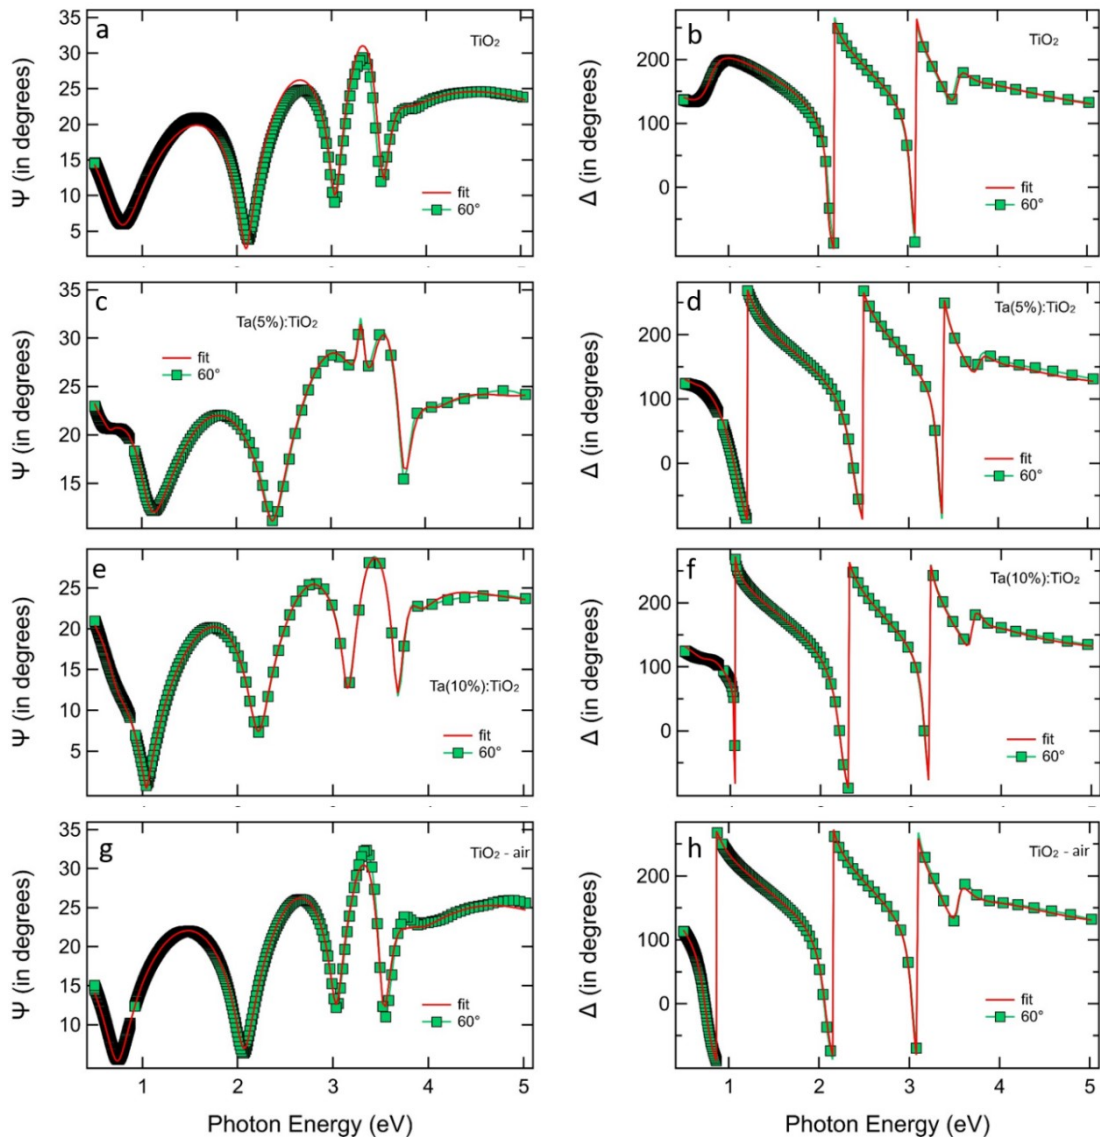

Figure S4 - Ellipsometric angles  $\Psi$  (left) and  $\Delta$  (right) as a function of photon energy for (a, b) vacuum-annealed  $\text{TiO}_2$ , (c, d)  $\text{Ta}(5\%):\text{TiO}_2$ , (e, f)  $\text{Ta}(10\%):\text{TiO}_2$  and (g, h) air-annealed  $\text{TiO}_2$  films thick 200 nm and grown on Si substrates, acquired with incident angle of  $60^\circ$ . Squares and lines represent experimental data and theoretical fit, respectively.

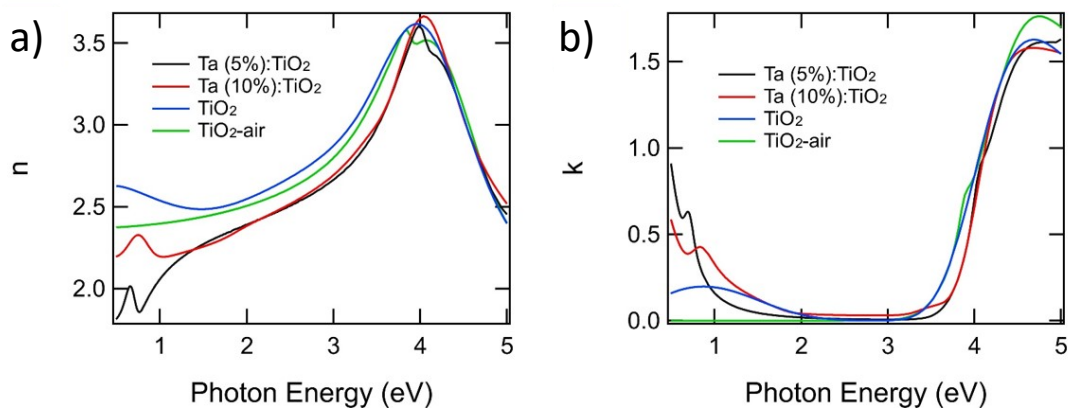

Figure S5 - (a) Refractive index ( $n$ ) and (b) extinction coefficient ( $k$ ) of the  $\text{Ta}:\text{TiO}_2$  films as extracted from the dielectric function. Measurements on vacuum- and air-annealed  $\text{TiO}_2$  films are reported for reference.

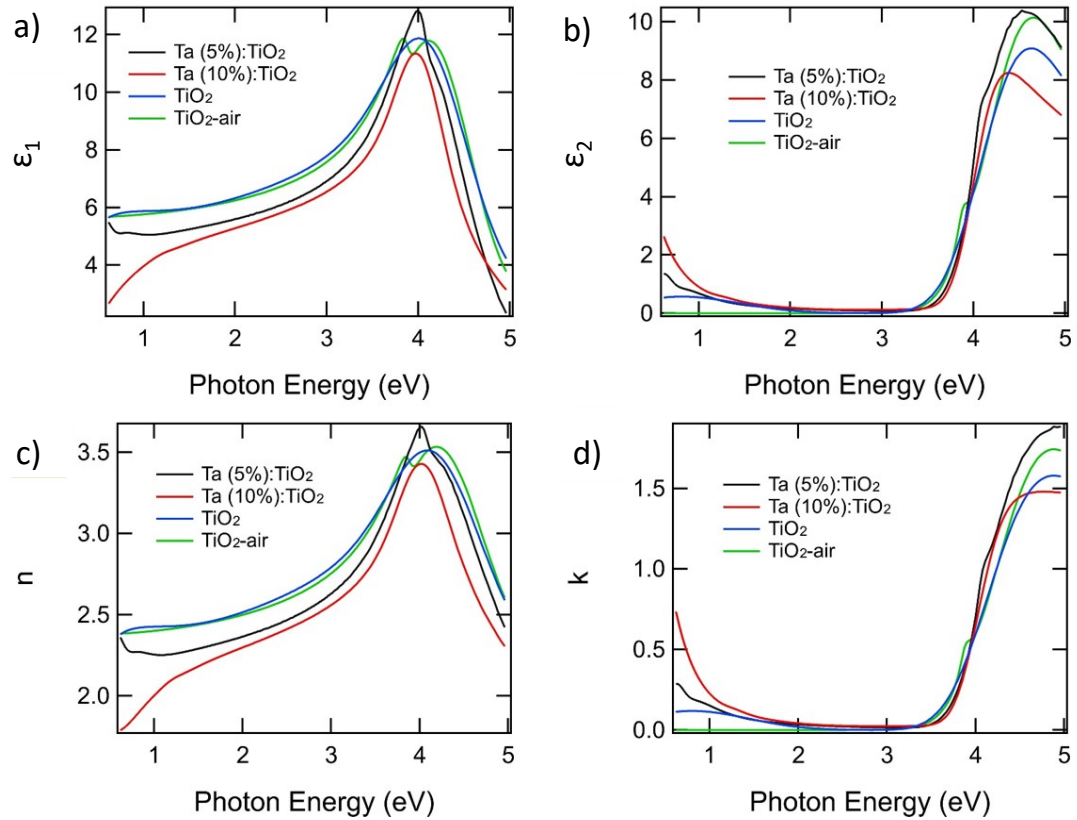

Figure S6 - (a) Real and (b) imaginary parts of the dielectric constant of Ta:TiO<sub>2</sub> films of different doping levels (5,10% at.), grown on soda-lime substrates, as extracted from the modelling of their transmission measurements by applying in the model the optical constants of Fig. 5. (c) Refractive index  $n$  and (d) extinction coefficient  $k$  of the Ta:TiO<sub>2</sub> films as extracted from the dielectric function. Measurements on vacuum- and air-annealed TiO<sub>2</sub> films (blue and green lines respectively) are reported for reference.

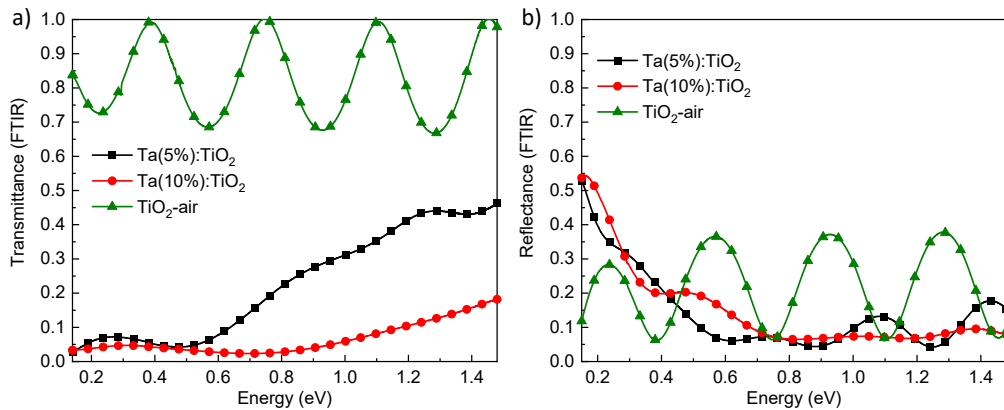

Figure S7 - (a) Transmittance and (b) reflectance spectra collected by Fourier Transform Infrared Spectroscopy (FTIR) of Ta(5%):TiO<sub>2</sub>, Ta(10%):TiO<sub>2</sub> and air-annealed TiO<sub>2</sub> (TiO<sub>2</sub>-air) films thick 670 nm and grown on CaF<sub>2</sub> substrate.
